# Supplementary material for: New insights into virulence mechanisms of rice pathogen Acidovorax avenae subsp. avenae strain RS-1 following exposure to ß-lactam antibiotics
Source: PubMed Central journal article supplement (PMC4768089; doi:10.1038/srep22241), 2016-02-26
Supplement: srep22241-s1.pdf [file srep22241-s1.pdf]

22 **Supplementary Information**

23

24 **Figure S1**

25 FTIR analysis of the EPS from *Acidovorax avenae* subsp. *avenae* strain RS-1. (a) The  
26 *hcp*-mutant strain; (b) The wild type strain under exposure to Amp; (c) The wild type  
27 strain. Compared to the wild type, both the mutation of *hcp* gene and exposure to  
28 Amp caused the disappearance of one peak at  $859.16\text{ cm}^{-1}$  representing phenyl ring  
29 substitution bands/alkenes. Each experiment was repeated three times independently  
30 with similar results.

31

32

33 **Figure S2**

34 Gene ontology categories for the differentially expressed genes under Amp (+) vs.  
35 Amp (-) condition of *Acidovorax avenae* subsp. *avenae* strain RS-1 transcriptome. All  
36 genes were classified into Biological process, Molecular function and Cellular  
37 component catalogs based on their gene ontology annotations.

38

39

40 **Figure S3**

41 Expression changes of T6SS-related genes in *Acidovorax avenae* subsp. *avenae* strain  
42 RS-1. (a) Mutation of *hcp* gene; (b) Exposure to Amp. Each result represents the  
43 average of three independent determinations with similar results.

44

45

46

47

48 **Table S1**

49 Primers used in this study.

50

51

52 **Table S2.**

53 Effect of three kinds of  $\beta$ -lactam antibiotics on the growth and pathogenicity of  
54 *Acidovorax avenae* subsp. *avenae* strain RS-1 to rice seedlings.

55

56

57 **Table S3.**

58 Summary of *Acidovorax avenae* subsp. *avenae* strain RS-1 cDNA samples sequenced  
59 using the Illumina genome analyzer.

60

61

62 **Table S4**

63 RNA-Seq data of *Acidovorax avenae* subsp. *avenae* strain RS-1 under Amp (-) and  
64 Amp (+) conditions. The data of Amp (-) obtained from Li *et al.* (2014)<sup>10</sup> were used as  
65 the control in this study.

66

67

68 **Table S5**

69 List of specifically expressed genes under Amp (+) condition of *Acidovorax avenae*  
70 subsp. *avenae* strain RS-1 transcriptome.

71

72

73 **Table S6**

74 List of specifically expressed genes under Amp (-) condition of *Acidovorax avenae*  
75 subsp. *avenae* strain RS-1 transcriptome.

76

77

78 **Table S7**

79 List of the common expressed genes under both Amp (-) and Amp (+) conditions of  
80 *Acidovorax avenae* subsp. *avenae* strain RS-1 transcriptome.

81

82

83 **Table S8**

84 List of up-regulated expressed genes under Amp (+) vs. Amp (-) condition of  
85 *Acidovorax avenae* subsp. *avenae* strain RS-1 transcriptome.

86

87

88 **Table S9**

89 List of down-regulated expressed genes under Amp (+) vs. Amp (-) condition of  
90 *Acidovorax avenae* subsp. *avenae* strain RS-1 transcriptome.

91

92

93 **Table S10**

94 List of differentially expressed  $\beta$ -lactamase-related genes under Amp (+) vs. Amp (-)  
95 condition of *Acidovorax avenae* subsp. *avenae* strain RS-1 transcriptome.

96

97

98 **Table S11**

99 qRT-PCR analysis of T6SS genes expression in *Acidovorax avenae* subsp. *avenae*  
100 strain RS-1 under Amp (+) vs. Amp (-) condition.

101

102

103 **Table S12**

104 Gene ontology enrichment analysis for differentially expressed genes under Amp (+)  
105 vs. Amp (-) condition of *Acidovorax avenae* subsp. *avenae* strain RS-1 transcriptome.

106

107

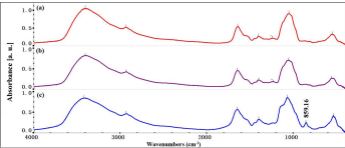



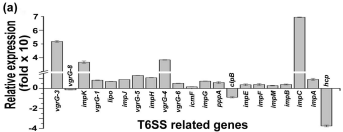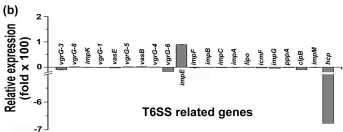

**Table S1 Primers used in this study**

| <b>Name</b> | <b>Sequence (5'- 3')</b>                                                  | <b>Usage description</b>                 | <b>Sources or References</b>      |
|-------------|---------------------------------------------------------------------------|------------------------------------------|-----------------------------------|
| Pt-hcp      | F-CCTCGGATCCATGTCCGTCGATATGTTTCATG<br>R-GCGCGAATTCTTACATTTTCCTTGTGGCCCTTG | Pull-Down and<br>Bacterial<br>Two-hybrid | This study                        |
| Pt-vgrG     | F-CCGAATTCATGACACGCAGCGTCACCATAC<br>R-CATCTCGAGGTGCACGATGAGCCCGTTCTTG     | Pull-Down                                | This study                        |
| Pt-lipo     | F-GCGGATCCATGCATCGGGAAGCGATGGC<br>R-CCGGAATTCGCGGTCTGGATCTTCACCGC         | Pull-Down                                | This study                        |
| Th-hcp      | F-CCTCGGATCCATGTCCGTCGATATGTTTCATG<br>R-GCGCGAATTCTTACATTTTCCTTGTGGCCCTTG | Bacterial<br>Two-hybrid                  | This study                        |
| Th-lipo     | F-GCGGATCCATGCATCGGGAAGCGATGGC<br>R-CCGGAATTCGCGGTCTGGATCTTCACCGC         | Bacterial<br>Two-hybrid                  | This study                        |
| Th-vgrG     | F-CCTCTAGAATGACACGCAGCGTCACCATAC<br>R-CCGAATTCGTGCACGATGAGCCCGTTCTTGCC    | Bacterial<br>Two-hybrid                  | This study                        |
| GK-hcp-F    | F-TATGGATCCATTTTCCTTGTGGCCCTTG<br>R-GCGGAATTCGACATCCGTTTCCTTCAC           | Gene Knockout                            | This study                        |
| 16S         | F-TTGCGGTCCCCTGCTTTCAT                                                    | Quantitative                             | Li et al.                         |
| rRNA        | R-CGGTAACAGGTCTTCGGATGCT                                                  | Real-time PCR                            | (2014) <sup>10</sup>              |
| clpB        | F-GCAGGGCGAGAAGGACAAG<br>R-GCCGAGGAACAGGAACGAG                            | Quantitative<br>Real-time PCR            | Li et al.<br>(2014) <sup>10</sup> |
| hcp         | F-CTGGGTCAGGTGGAGATCTC<br>R-TGGGTCTTGATTTGGCTGC                           | Quantitative<br>Real-time PCR            | Li et al.<br>(2014) <sup>10</sup> |
| dotU        | F-CCAGCATTACCTGCTCGAAT<br>R-CCAGGTCTCGTTGTGCAGT                           | Quantitative<br>Real-time PCR            | Li et al.<br>(2014) <sup>10</sup> |
| icmF        | F-ACCGTGGGCAGCAATCTCA<br>R-GCGAAGTCATCGCTCGTCA                            | Quantitative<br>Real-time PCR            | Li et al.<br>(2014) <sup>10</sup> |
| impA        | F-CTTGAACCTGCGGCGGACAC<br>R-GCTCGGCGGGAATCACCAT                           | Quantitative<br>Real-time PCR            | Li et al.<br>(2014) <sup>10</sup> |
| impB        | F-ATCTCCCTCATCCTGCTCA<br>R-TCAGATGCGTCCCATCAG                             | Quantitative<br>Real-time PCR            | Li et al.<br>(2014) <sup>10</sup> |
| impC        | F-GCACCACCTGGTCCACAACA<br>R-CGAACTGGCCGTATTCTCT                           | Quantitative<br>Real-time PCR            | Li et al.<br>(2014) <sup>10</sup> |
| impE        | F-TGATCGGCTCGCTGTTCG<br>R-TGCTTGTA CTGCCCCTTGTT                           | Quantitative<br>Real-time PCR            | Li et al.<br>(2014) <sup>10</sup> |
| impF        | F-TGGACTGGAAGGACGTGGAA<br>R-AGGGTGTGTGGTGGTTGAA                           | Quantitative<br>Real-time PCR            | Li et al.<br>(2014) <sup>10</sup> |
| impG        | F-TGGAACCTCGGCCTCTATGG<br>R-TGGTGGAAAGATGTCCGAGAA                         | Quantitative<br>Real-time PCR            | Li et al.<br>(2014) <sup>10</sup> |
| impH        | F-GCCACAAGTTCCTTTTGCA<br>R-AAGAACGGCACGAAATCC                             | Quantitative<br>Real-time PCR            | Li et al.<br>(2014) <sup>10</sup> |
| impJ        | F-TCCAGGATGCCAACGACA<br>R-GACCACGGTGGGAATGAA                              | Quantitative<br>Real-time PCR            | Li et al.<br>(2014) <sup>10</sup> |



---

|        |                         |               |                      |
|--------|-------------------------|---------------|----------------------|
| impM   | F-GCAATGGCGTCGTCCTCT    | Quantitative  | Li et al.            |
|        | R-CGGTCGTGCCGATCTTCT    | Real-time PCR | (2014) <sup>10</sup> |
| lipo   | F-GCAGTGGGATGTCCGTACCTT | Quantitative  | Li et al.            |
|        | R-TCCTTGCCACCGTGATGCT   | Real-time PCR | (2014) <sup>10</sup> |
| pppA   | F-AGATCACGCGGGACCATT    | Quantitative  | Li et al.            |
|        | R-TTCCTCGTCGTCGAGCAT    | Real-time PCR | (2014) <sup>10</sup> |
| vgrG-1 | F-ATCCGATGGAAAAGAACTC   | Quantitative  | Li et al.            |
|        | R-AATAGATGCCCTCGTGCT    | Real-time PCR | (2014) <sup>10</sup> |
| vgrG-2 | F-GCGTGCAATATGACGAGAGC  | Quantitative  | Li et al.            |
|        | R-CCGGCGGATAGAAGGGAATC  | Real-time PCR | (2014) <sup>10</sup> |
| vgrG-4 | F-CTGACGCAGAGCACGAAT    | Quantitative  | Li et al.            |
|        | R-CCGAAGCACCATACCA      | Real-time PCR | (2014) <sup>10</sup> |
| vgrG-5 | F-CATCAAGACCAAGTCCAGC   | Quantitative  | Li et al.            |
|        | R-CAGCCATAATTGCTCTGC    | Real-time PCR | (2014) <sup>10</sup> |
| vgrG-7 | F-CCGATGGAAAAGAACTCAG   | Quantitative  | Li et al.            |
|        | R-AATAGATGCCCTCGTGCT    | Real-time PCR | (2014) <sup>10</sup> |
| vgrG-8 | F-TCCTTCCAGAAGTTCAGCC   | Quantitative  | Li et al.            |
|        | R-GGTATTCGTCGGTCCAGATT  | Real-time PCR | (2014) <sup>10</sup> |

---

1

2

3 **Table S2.**4 Effect of three kinds of  $\beta$ -lactam antibiotics on the growth and pathogenicity of5 *Acidovorax avenae* subsp. *avenae* strain RS-1 to rice seedlings.

| Treatments  | Bacterial growth (OD600) |        |        | Plant parameters |          |           |
|-------------|--------------------------|--------|--------|------------------|----------|-----------|
|             | 12 h                     | 24 h   | 48 h   | Root length      | Height   | Emergence |
| Strain RS-1 | 0.15 b                   | 0.82 c | 1.24 b | 15.94 b          | 9.16 b   | 23.33 c   |
| + Amp       | 0.03 d                   | 0.79 d | 1.20 b | 28.97 a          | 21.06 a  | 67.74 a   |
| + Amo       | 0.03 c                   | 0.92 b | 0.97 c | 38.47 a          | 36.63 a  | 40.00 b   |
| + Pen       | 0.34 a                   | 1.12 a | 1.33 a | 49.10 a          | 43.60 a  | 36.67 b   |
| None        | -                        | -      | -      | 177.40 a         | 132.47 a | 100.0 a   |

6 In absence of pathogen, exposure to Amo caused a 20.05%, 40.49% and 20.00%

7 reduction, while exposure to Pen resulted in a 48.93%, 32.79% and 20.00% reduction

8 in root length, plant height and emergence compared to the control. However, there

9 was no significant ( $P < 0.05$ ) difference in plant parameter between Amp (+) and10 Amp (-). The same letters indicate no significant differences ( $P < 0.05$ ) among

11 treatments. Each treatment has 25 replicates and this experiment was repeated four

12 times independently with similar results.

13

1

2

3 **Table S3.**

4 Summary of *Acidovorax avenae* subsp. *avenae* strain RS-1 cDNA samples sequenced  
5 using the Illumina genome analyzer

---

| Sample name                                          | Amp (+, 1)    | Amp (+, 2) |
|------------------------------------------------------|---------------|------------|
| Number of reads                                      | 14,537,291    | 16,443,928 |
| Mapped reads                                         | 12,679,967    | 15,732,263 |
| Unique mapped                                        | 4,755,618     | 6,149,831  |
| mRNA percent                                         | 35.1%         | 39.1%      |
| Number and percentage at different transcript levels |               |            |
| High-                                                | 809 (16.68%)  |            |
| Medium-                                              | 1088 (22.43%) |            |
| Low-                                                 | 2014 (41.52%) |            |
| None-                                                | 940 (19.38%)  |            |

---

6 Classification of transcription profile for various categories of transcription level was  
7 carried out as described by Nagalakshimi et al. (2008)<sup>25</sup>. The data of Amp (-) used as  
8 the control in this study were obtained from Li et al. (2014)<sup>10</sup>.

9
